# Supplementary material
Source: PubMed Central journal article supplement (PMC5400840)
Supplement: IAI.00949-16_zii999092028s1.pdf [file IAI.00949-16_zii999092028s1.pdf]

## Supplemental Information

### Generation of pilus-negative mutants in strains MGAS10870 and MGAS10870/*liaS*<sup>R135G</sup>

Briefly, a three-step process was used to generate a PCR fragment in which the entirety of the *tee3* open reading frame (ORF) was removed. Primer pair MSP328 and MSP363 were used to generate a 1,001-bp fragment including the 29-bp immediately upstream of the *tee3* ORF. Likewise, primer pair MSP331 and MSP365 were used to generate a 1,058-bp fragment including the last 24-bp immediately downstream of the *tee3* ORF. Primer pair MSP364 and MSP366 were used to amplify *aad9* with ends homologous to the immediate upstream and downstream flanking regions of the *tee3* ORF. The three PCR fragments were then used to generate a 2,761-bp fragment using primer pair MSP328 and MSP331 in a ligation PCR in which all of the *tee3* gene was replaced, in-frame, by the spectinomycin cassette, *aad9*. The resulting PCR fragment was then digested with *Bam*HI and *Xho*I and ligated into the same sites of pJL1055 to generate pMAS5. Strains MGAS10870 and MGAS10870/*liaS*<sup>R135G</sup> were electroporated with pMAS5 and recombinant mutants selected on THY agar supplemented with spectinomycin.

### Human neutrophil survival assays

Human neutrophils (polymorphonuclear leukocytes or PMNs) were isolated from heparinized venous blood of healthy volunteer donors (n=14) in accordance with a protocol approved by the Institutional Review Board for Human Subjects at Montana State University. All subjects provided written informed consent. Neutrophils were isolated as previously described (1). Purity (less than 1% peripheral blood mononuclear cell [PBMC] contamination) and viability using propidium iodide uptake were assayed via flow cytometry with a FACSCalibur™ (BD Biosciences, San Jose, CA, USA). Neutrophils were suspended in RPMI 1640 supplemented with 5 mM HEPES. To evaluate GAS survival following neutrophil interaction, neutrophils were

combined with GAS opsonized with autologous serum in serum coated 96-well tissue culture plates at a ~1:10 neutrophil: bacteria ratio. Phagocytosis was synchronized by centrifugation at 500 x g for 8 minutes at 4°C and incubated at 37°C for 3 hours. Neutrophils were lysed with 0.1% saponin (15 minutes on ice) and GAS were plated on THY agar. Colonies were enumerated the following day and percent survival was calculated with the equation  $(CFU_{+PMN} \text{ at } 3\text{hr} / CFU_{+PMN} \text{ at } 0\text{hr}) \times 100$ .

### **Cultured human epithelial cell adherence and internalization assays**

Adherence to cultured human epithelial cells was carried out as previously described (2-4). HaCaT cells (human skin epithelial cells; P. Sumbly) were incubated at 38.5°C and HEp-2 cells (HeLa contaminant; ATCC) were incubated at 37°C. The appropriate GAS strains were grown to mid-exponential phase ( $OD_{600} \approx 0.5$ ) in THY, pelleted, washed with sterile PBS and approximately  $1 \times 10^7$  CFU GAS ( $MOI \approx 10$ ) were added to 12 replicate wells, rocked briefly, and incubated for 2 hrs at 37°C. Wells were subsequently washed three times with PBS and incubated at 37°C with 1 mL PBS containing 1% saponin (Oxoid). Cells were released from wells by pipetting, serially diluted, and plated on SBA to enumerate GAS. Percent adherence was calculated by dividing recovered CFU by the original inoculum.

GAS internalization to cultured epithelial cells was carried out as previously described (2). Briefly, GAS strains were added to HEp-2 cells as for adhesion assays above, incubated for 2 hrs, and washed three times with 2 mL PBS. Gentamicin was then added to each well at a concentration of 100µg/ml and incubated for 1 hr at 37°C to kill extracellular GAS. Each well was then washed 3x with 1 ml PBS to remove antibiotics. HEp-2 cells were released from the wells using 0.25% trypsin/ 1M EDTA. Cells were lysed using sterile water, serially diluted, and plated on SBA to enumerate GAS. Percentage internalization was calculated by dividing the recovered CFU by the original inoculum.

**Table S1.** Strains used in this study.

| Strain                                                        | Characteristics                                                                                   | Reference  |
|---------------------------------------------------------------|---------------------------------------------------------------------------------------------------|------------|
| MGAS10870                                                     | Invasive                                                                                          | (5)        |
| MGAS10870 <i>liaS</i> <sup>R135G</sup>                        | MGAS10870 with <i>liaS</i> <sup>R135G</sup> carrier mutation                                      | (4)        |
| MGAS10870 $\Delta$ <i>tee3</i>                                | $\Delta$ <i>tee3</i> , pilus-negative mutant in MGAS10870                                         | This study |
| MGAS10870 <i>liaS</i> <sup>R135G</sup> / $\Delta$ <i>tee3</i> | <i>liaS</i> <sup>R135G</sup> , $\Delta$ <i>tee3</i> ; pilus-negative mutant with carrier mutation | This study |

**Table S2.** Plasmids and primers used in this study.

| Plasmid           | Characteristics                                            | Reference  |
|-------------------|------------------------------------------------------------|------------|
| pMAS5             | pJL1055/ $\Delta$ <i>tee3</i> :: <i>aad9</i> ]             | This study |
| Primer            | Sequence (5'-3')                                           | Use        |
| MSP328            | GTTACTGGATCCATTGCAGATAAG                                   | PCR        |
| MSP331            | TGATAAACTCGAGAAGTATATTGC                                   | PCR        |
| MSP363            | CTTTATTAATTTGTTTCGTATGTATTC AATTTTTCTCTCTCCAAATTTTTTAAATCC | PCR        |
| MSP364            | GGAATTTAAAAAATTTGGAGAGAGAAAAATTGAATACATACGAACAAATTAATAAAG  | PCR        |
| MSP365            | ATAACAGATTAATAAATTATAAGTGATTAGTCAAAGAATGGTGATG             | PCR        |
| MSP366            | CATCACCACTTTGACTAATCACTTATAATTTTTTAATCTGTTAT               | PCR        |
| <i>nra</i> -for   | TAACTGCAAATTGGTGGCGC                                       | TaqMan     |
| <i>nra</i> -rev   | GAACATCGCCCTGGCTAGAG                                       | TaqMan     |
| <i>nra</i> -p     | TCCATGACAAGGCAAGTAACA                                      | TaqMan     |
|                   |                                                            | Probe      |
| <i>cbp</i> -for   | AAGCGACGAAAGCCTCAGTT                                       | TaqMan     |
| <i>cbp</i> -rev   | GCCCCATCTGTTGTCAAACC                                       | TaqMan     |
| <i>cbp</i> -p     | CCGAAAAGATCTTGTCCCACC                                      | TaqMan     |
|                   |                                                            | Probe      |
| <i>tee3</i> -for  | AGCGTGACACTCAAGTTCCA                                       | TaqMan     |
| <i>tee3</i> -rev  | TCCACCAATAGCCACAATGCT                                      | TaqMan     |
| <i>tee3</i> -p    | ACCCTTGCTCCATTTGCAGT                                       | TaqMan     |
|                   |                                                            | Probe      |
| <i>msmR</i> -for  | GTGAGGTTCTTTCCGCCCT                                        | TaqMan     |
| <i>msmR</i> -rev  | AGCAAGAAATCAATCGCATCCC                                     | TaqMan     |
| <i>msmR</i> -p    | AGAGCAGAAATAGAAGATGAGGTGA                                  | TaqMan     |
|                   |                                                            | Probe      |
| <i>mga</i> -for   | CAAGTCAACAGTGGAGAGAACTAAAATTA                              | TaqMan     |
| <i>mga</i> -rev   | ATGGAGATGTTGAGAGCTTTGCT                                    | TaqMan     |
| <i>mga</i> -p     | TCATACGTAACAGAAAACGCTGACGCCATT                             | TaqMan     |
|                   |                                                            | Probe      |
| <i>spxA2</i> -for | AAGGATGCGCGGGTTATCTT                                       | TaqMan     |

|                   |                              |                 |
|-------------------|------------------------------|-----------------|
| <i>spxA2</i> -rev | ATGCCAAAGCTCTCGATTGC         | TaqMan          |
| <i>spxA2</i> -p   | TCAAATCAATAACCTCACTAACACTT   | TaqMan<br>Probe |
| <i>tufA</i> -for  | CAACTCGTCACTATGCGCACAT       | TaqMan          |
| <i>tufA</i> -rev  | GAGCGGCACCACTGATCAT          | TaqMan          |
| <i>tufA</i> -p    | CTCCAGGACACGCGGACTACGTTAAAAA | TaqMan<br>Probe |

---

## References

1. **Voyich, J. M., K. R. Braughton, D. E. Sturdevant, A. R. Whitney, B. Said-Salim, S. F. Porcella, R. D. Long, D. W. Dorward, D. J. Gardner, B. N. Kreiswirth, J. M. Musser, and F. R. DeLeo.** 2005. Insights into mechanisms used by *Staphylococcus aureus* to avoid destruction by human neutrophils. *J Immunol.* **175**:3907-19.
2. **Flores, A. R., B. E. Jewell, R. J. Olsen, S. A. Shelburne, 3rd, N. Fittipaldi, S. B. Beres, and J. M. Musser.** 2014. Asymptomatic carriage of group A *Streptococcus* is associated with elimination of capsule production. *Infect Immun.* **82**:3958-67.
3. **Flores, A. R., B. E. Jewell, E. M. Versalovic, R. J. Olsen, B. A. Bachert, S. Lukomski, and J. M. Musser.** 2015. Natural variant of collagen-like protein A in serotype M3 group A *Streptococcus* increases adherence and decreases invasive potential. *Infect Immun.* **83**:1122-9.
4. **Flores, A. R., B. E. Jewell, D. Yelamanchili, R. J. Olsen, and J. M. Musser.** 2015. A single amino acid replacement in the sensor kinase LiaS contributes to a carrier phenotype in group A *Streptococcus*. *Infect Immun.* **83**:4237-46.
5. **Beres, S. B., R. K. Carroll, P. R. Shea, I. Sitkiewicz, J. C. Martinez-Gutierrez, D. E. Low, A. McGeer, B. M. Willey, K. Green, G. J. Tyrrell, T. D. Goldman, M. Feldgarden, B. W. Birren, Y. Fofanov, J. Boos, W. D. Wheaton, C. Honisch, and J. M. Musser.** 2010. Molecular complexity of successive bacterial epidemics deconvoluted by comparative pathogenomics. *Proc Natl Acad Sci U S A.* **107**:4371-6.
